# Supplementary material
Source: PubMed Central journal article supplement (PMC4987155)
Supplement: supp_3.4.E413_original_submission.pdf [file supp_3.4.E413_original_submission.pdf]

1  
2  
3 **Validity and utility of ICD-10 administrative health data for identifying ST- and non ST-**  
4 **elevation Myocardial Infarction**

5  
6  
7 Alka B Patel<sup>1</sup>, PhD, Hude Quan<sup>1</sup>, MD, PhD, Robert C Welsh<sup>2</sup>, MD, Jessica Deckert-Sookram<sup>2</sup>,  
8  
9 MD, Wayne Tymchak<sup>2</sup>, MD, Sunil Sookram<sup>2</sup>, MD, Ian Surdhar<sup>2</sup>, Padma Kaul<sup>2\*</sup>, PhD

10  
11  
12  
13  
14 <sup>1</sup>Department of Community Health Sciences, University of Calgary, Calgary, Canada

15  
16 <sup>2</sup>Faculty of Medicine & Dentistry University of Alberta, Edmonton, Canada

17  
18  
19 \*Corresponding author

20  
21 **Word count:** 2360

22  
23  
24  
25  
26  
27  
28  
29  
30  
31  
32  
33 **Address for correspondence:**

34  
35 Padma Kaul, PhD

36  
37 2-132 Li Ki Shing Centre

38  
39 University of Alberta

40  
41  
42 Edmonton, Alberta, T6G 2E1

43  
44  
45 Phone: (780) 492-1140

46  
47 Email: [pkaul@ualberta.ca](mailto:pkaul@ualberta.ca)

**Abstract (237)**

Background: Healthcare administrative databases are extremely useful for assessing the population-level burden of disease and examining issues related to access, costs, and quality of care. In these databases, the diagnoses and procedures are coded using the World Health Organization (WHO) International Classification of Disease (ICD). We examined the validity of two ICD version 10 (ICD-10) coding definitions for categorizing acute myocardial infarction (AMI) patients as ST-elevation myocardial infarction (STEMI) or Non-ST-elevation myocardial infarction (NSTEMI).

Methods: Charts of AMI patients (April-June 2007) were reviewed to define the AMI subtype (i.e. STEMI and NSTEMI). The agreement between clinician chart review and STEMI/NSTEMI classification based on: 1) the standard (ICD-10 I21.x); and 2) the supplementary electrocardiogram (ECG) codes (R94.3x) was determined. We assessed the impact of these alternative definitions on in-hospital mortality estimates by applying them to a cohort of all AMI patients from April 2007 – March 2010.

Results: Of 297 AMI patients, 49.3% were identified as STEMI based on chart review, 45.5% using the standard definition and 45.3% using the ECG definition. Both the standard and ECG definitions provided high agreement (92% for STEMI and 100% for NSTEMI) with the chart review classification. In the larger population-level cohort (n=15,148), using the standard definition or the ECG definition did not impact in-hospital mortality estimates for STEMI and NSTEMI patients.

Conclusions: The standard definition appears equivalent to the definition using supplementary ECG codes to subcategorize AMI patients as STEMI or NSTEMI.

## Introduction

Healthcare administrative databases, such as those maintained by the Centers for Medicare and Medicaid Services (CMS) in the US and by provincial and federal agencies in Canada and other countries are extremely useful for assessing the population-level burden of disease and examining issues related to access, costs, and quality of care.<sup>1-5</sup> In these databases, the diagnoses and procedures are coded using the World Health Organization (WHO) International Classification of Disease (ICD).<sup>6</sup> With the exception of the US, all developed countries currently use version 10 of the ICD. The US is scheduled to switch from its current ICD-9-CM version to ICD-10 by October 2015. Because the WHO permits its member countries to add country-specific diagnosis codes or specify conditions using sub-codes in ICD-10, several countries have developed their own ICD-10 versions.<sup>7</sup>

The incidence and clinical characteristics of patients presenting with *ST-elevation* myocardial infarction (STEMI) and *non-ST-elevation* myocardial infarction (NSTEMI) vary significantly.<sup>8,9</sup> These differences underline the importance of accurately classifying acute myocardial infarction (AMI) sub-types when examining patient outcomes. Historically, primarily due to limitations in coding algorithms, studies using administrative data to examine treatment and outcomes of AMI have grouped STEMI and NSTEMI together.<sup>10,11</sup> However, the improved ICD-10 codes distinguish between STEMI and NSTEMI patients.<sup>12</sup> In April 2007, the Canadian version of ICD-10 introduced secondary diagnosis codes for cardiovascular function based on the electrocardiogram ECG.<sup>13</sup> Whether these supplementary codes are more accurate than the standard ICD-10 codes in differentiating between the AMI subtypes is not known.

The primary objective of our study was to evaluate the agreement of the standard definition (based on ICD-10 Q-wave codes alone) and the ECG definition (based on supplementary ECG codes) for classifying STEMI and NSTEMI with chart review by clinicians. We also applied both

1  
2 the standard and ECG definitions to a large in-patient AMI population and examined the extent to  
3  
4 which in-hospital mortality estimates were affected by the use of the alternative definitions.  
5  
6

## 7 **Methods**

### 8 Defining STEMI and NSTEMI in Chart Data

9  
10 All patients discharged from hospital with a diagnosis of AMI in Edmonton, Alberta Canada  
11  
12 (population of approximately 1 million) undergo review by a trained chart abstractor. This is  
13  
14 conducted as part of a dedicated quality assurance program linked to the Vital Heart Response  
15  
16 (VHR) clinical program. VHR is a regional reperfusion program focused on delivering expeditious  
17  
18 evidence based care for STEMI patients. To validate the chart abstraction process and confirm  
19  
20 appropriate patient selection, charts from the three major hospitals in VHR were obtained. Patients  
21  
22 with a diagnosis of AMI were independently abstracted to obtain an approximately equal sample of  
23  
24 patients defined as STEMI and NSTEMI. Subsequently, two experienced clinicians reviewed the  
25  
26 patients abstracted data, interpreted the 12-lead ECG and reviewed peak myocardial enzymes  
27  
28 blindly determining clinical diagnosis of NSTEMI vs. STEMI (SS and WT). The AMI sub-type  
29  
30 classification based on clinician chart reviews was used as the reference standard.  
31  
32  
33  
34  
35  
36

### 37 Defining STEMI and NSTEMI in Administrative Data

38  
39 We used two definitions to categorize AMI patients as STEMI and NSTEMI. The *standard*  
40  
41 *definition* was the presence of the following codes in the primary diagnosis field: ICD-10 codes  
42  
43 I21.0-3 for STEMI and I21.4x for NSTEMI.  
44  
45  
46

47 A patient presenting with an ECG indicative of STEMI can progress to a Q-wave MI, a  
48  
49 non-Q wave MI or an aborted MI, while those with no ST-elevation on the ECG are defined as  
50  
51 having NSTEMI and can only progress to a non-Q wave MI or unstable angina.<sup>13</sup> As a result, all  
52  
53 patients that are coded with Q-wave MI (I21.0-3) should be STEMI, but some coded with non-Q  
54  
55 wave MI (I21.4x) could also be STEMI. This shows why the supplementary ECG codes that can  
56  
57 distinguish between ECG results suggestive of STEMI (R94.30) or NSTEMI (R94.31) could be  
58  
59  
60

1  
2  
3  
4  
5  
6  
7  
8  
9  
10  
11  
12  
13  
14  
15  
16  
17  
18  
19  
20  
21  
22  
23  
24  
25  
26  
27  
28  
29  
30  
31  
32  
33  
34  
35  
36  
37  
38  
39  
40  
41  
42  
43  
44  
45  
46  
47  
48  
49  
50  
51  
52  
53  
54  
55  
56  
57  
58  
59  
60

useful in accurately categorizing patients into the two subtypes.<sup>13</sup> The ECG codes were introduced in April 2007 in Canada and therefore our validation study used the chart reviews of patients who were discharged from the three hospitals between April-June 2007. In our study, the *ECG definition* is the presence of ICD-10 code R94.30 in any diagnosis field for STEMI and ICD-10 code R94.31 in any diagnosis field for NSTEMI.

### Analysis

The chart data were linked with hospital discharge abstract data (DAD) from April-June 2007 using the unique identifier of a personal health number (PHN). The DAD includes data on age, sex, length of stay, up to 25 diagnoses, 16 procedures, and discharge status. These linked DAD records were extracted using the date of admission and most responsible diagnosis of I21 (acute myocardial infarction). Those patients with invalid PHN were removed to create our final sample for the validation study.

We compared the agreement between the clinician chart review classification to the STEMI/NSTEMI classification based on the standard definition and the ECG definition. Those patients with an unspecified MI (I21.9) or an unspecified ECG result (R94.38) were excluded from the analysis. The agreement between chart review and the two sub-type definitions was calculated overall and by sex and age.

### Utility of AMI sub-types in DAD

To determine the effects of sub-type definition when evaluating patient outcome, the standard and ECG definitions were applied to a dataset of all patients admitted to a hospital with AMI in Alberta, Canada between April 1, 2007 and March 31, 2010. This dataset contained information on age, sex, length of stay, diagnoses, procedural interventions and in-hospital mortality. Patients who had a primary diagnosis of I21.x were included in this assessment. A record of R94.3x (supplementary ECG code) in any of the secondary diagnosis fields was captured. The unit of analysis was the patient. To test the utility of the coding definitions, we calculated the in-

1  
2 hospital mortality proportion for STEMI and NSTEMI patients identified using the standard and  
3  
4 ECG definition.  
5  
6

7 Data analysis was conducted using SAS version 9.2. The ethics board of the University of  
8  
9 Alberta felt the study was for quality assurance purposes and did not require ethics approval.  
10

## 11 **Results**

### 12 Linking chart and administrative data

13  
14 Administrative data were linked with chart review data for 302 of 319 patients with a primary  
15  
16 diagnosis of AMI (I21.x) between April 1, and June 30, 2007 (Figure 1). Once duplicate records  
17  
18 and records with invalid PHN were removed, we had linked data for 297 patients. Seven patients  
19  
20 were excluded as they were coded as ‘Acute myocardial infarction, unspecified’ using I21.9, and  
21  
22 eight patients were excluded who were coded as R94.38, which does not specifically define the  
23  
24 STEMI or NSTEMI sub-type or had missing or conflicting R94.3x coding.  
25  
26  
27  
28  
29

30  
31 The number of patients classified as STEMI and NSTEMI by chart review, standard  
32  
33 definition, and ECG definition are presented in Table 1. For STEMI, the standard definition had a  
34  
35 higher agreement with chart review overall (92.3%) than the agreement between the ECG  
36  
37 definition and chart review (91.6%). The higher agreement between standard definition and chart  
38  
39 review relative to the agreement between ECG definition and chart review remained among males  
40  
41 and among both young (age < 65 years) and elderly (age ≥ 65 years). However, the agreement  
42  
43 statistic for both definitions was lower for elderly patients compared with younger patients. In  
44  
45 contrast to males, the ECG definition for STEMI had a higher level of agreement with chart review  
46  
47 among women (89.1%) compared with standard definition (87%).  
48  
49  
50

51  
52 The agreement between both the standard definition and the ECG definition for NSTEMI was  
53  
54 perfect, i.e., all patients identified by chart review as being NSTEMI were classified as NSTEMI  
55  
56 by both definitions. There were, however, STEMI patients who were categorized as NSTEMI  
57  
58 patients in our study. The level of misclassification was as follows: based on the standard  
59  
60

1  
2 definition, 7.7% of STEMI patients were classified as NSTEMI and 0% NSTEMI patients were  
3  
4 classified as STEMI; based on the ECG definition, 8.4% of STEMI were classified as NSTEMI and  
5  
6 0% NSTEMI were classified as STEMI.  
7  
8

### 9 10 Utility of AMI sub-type codes

11  
12 We applied the standard and ECG coding definitions for STEMI and NSTEMI to a larger  
13  
14 sample of 15,148 patients hospitalized with a primary diagnosis of AMI (I21.x) between April 1,  
15  
16 2007 and March 31, 2010. Among these patients, 5713 were diagnosed as STEMI (37.7%) and  
17  
18 9435 patients as NSTEMI (62.3%) based on the standard definition. There were 528 patients with  
19  
20 either an unspecified abnormal ECG result (R94.38) or with missing supplementary R94.3x code  
21  
22 (3.5%), and 20 patients had both the R94.30 and R94.31 codes (0.1%). When only the ECG  
23  
24 definition was used to define the AMI sub-types, 5530 (36.5%) were classified as STEMI and 9070  
25  
26 (59.9%) were classified as NSTEMI. Table 2 summarizes these findings and shows that the  
27  
28 calculation of in-hospital mortality is similar irrespective of which definition was employed.  
29  
30  
31  
32

### 33 **Discussion**

34  
35 Our study examining the validity of two definitions, one using standard ICD-10 codes and the  
36  
37 second using supplementary ECG codes, for categorizing AMI patients as STEMI or NSTEMI has  
38  
39 several novel and interesting findings. First, we found that both definitions were good at  
40  
41 differentiating between STEMI and NSTEMI for a sample of confirmed AMI patients. The  
42  
43 agreement between both definitions and clinician chart review was high across all patient  
44  
45 subgroups with the exception of the coding of STEMI for patients older than 65 years, where the  
46  
47 agreement was slightly lower. Second, for STEMI, the standard definition had a slightly higher  
48  
49 agreement with chart review (92.3%) than the agreement between the ECG definition and chart  
50  
51 review (91.6%). Third, the agreement between both the standard definition and the ECG definition  
52  
53 for NSTEMI was perfect, i.e., all patients identified by either definition as being NSTEMI were  
54  
55 classified as NSTEMI by chart review. And finally, when we applied the two definitions to a  
56  
57  
58  
59  
60

1  
2 database of AMI hospitalizations, we found that the different methods of classifying AMI sub-  
3  
4 types did not affect in-hospital mortality estimates.  
5  
6

7 The STEMI and NSTEMI sub-type coding validation relies on the validation of AMI first.  
8  
9 Studies have shown that AMI is coded well using ICD. A recent systematic review has reported  
10  
11 that there have been several studies validating the case definitions for AMI, with most studies  
12  
13 focused on ICD-9 and no studies validating exclusively ICD-10 codes.<sup>14</sup> The validity of these  
14  
15 diagnosis codes for identifying AMI has varied in the literature from a sensitivity of 66% to 95.1%  
16  
17 and a specificity of 80.2 to 100% depending on the subgroup, database and area studied.<sup>14</sup>  
18  
19 Although this systematic review revealed that there have been no studies conducted that validate  
20  
21 the AMI sub-types as defined using recently revised ICD coding definitions, ICD-9CM codes for  
22  
23 AMI patients have been used to differentiate between STEMI and NSTEMI patients<sup>15</sup> and more  
24  
25 recently ICD-10 codes have been used for this purpose.<sup>12</sup>  
26  
27  
28  
29  
30

31 Studies have been conducted evaluating the validity of ICD-9 coding for AMI. In one  
32  
33 Canadian province, Saskatchewan, a study using data from November 1999 – December 2001  
34  
35 found that ICD-9 codes for AMI had a PPV of 0.95 (95%CI: 0.91–0.98) for identifying those  
36  
37 patients with AMI based on detailed chart review as the gold standard<sup>16</sup>. While many studies  
38  
39 validating the case definitions of AMI using ICD coding have shown similar high positive  
40  
41 predictive value or sensitivity<sup>17</sup>, they have not distinguished the validity of AMI sub-types using  
42  
43 ICD coded data.  
44  
45

46  
47 There have been studies conducted in the United States validating the AMI sub-type coding  
48  
49 definitions for ICD-9CM. Using the current ICD-9CM coding definitions, NSTEMI patients are  
50  
51 those with a diagnosis code of 410.7, while those patients with codes 410-410.8 are classified as  
52  
53 STEMI patients<sup>18</sup>. One US study with a very large sample size (over 1 million) found that 10.9% of  
54  
55 patients who were found to have STEMI based on an ECG were coded as 410.71, while 38.8% of  
56  
57 patients with ECG indicative of NSTEMI had an ICD-9 code other than 410.71<sup>19</sup>. Our study shows  
58  
59  
60



1  
2 that the Canadian ICD-10 codes were less likely to misclassify both STEMI and NSTEMI than has  
3  
4 previously been reported using ICD-9CM.  
5  
6

7 Using data from the 2000-2001 fiscal years, researchers found that MI as recorded in medical  
8  
9 charts was incomplete and inconsistent in its ability to distinguish between STEMI and NSTEMI  
10  
11 and that up to 20% of medical records could not be used for retrospective MI sub-type specific  
12  
13 research<sup>20</sup>. The inconsistencies in the medical record review are one possible reason for the  
14  
15 misclassification of coded information. If the information in the charts is not recorded completely,  
16  
17 then it is not possible for coders to transfer this information to the administrative data codes that  
18  
19 could then be used to distinguish between AMI sub-types. When we applied the sub-type coding  
20  
21 definitions in our study we found that approximately 0.13% of patients in our sample were  
22  
23 inconsistently coded with codes that included an R94.3x code representing one sub-type with an  
24  
25 R94.3x code of a different sub-type. One could speculate that the lower agreement for the coding  
26  
27 of STEMI for adults older than 65 years could be due to physician documentation being less for  
28  
29 seniors with multiple conditions than younger patients. It is also possible that coders spend less  
30  
31 time on senior's records when there are large amounts of information on conditions.  
32  
33  
34  
35  
36

37  
38 There are limitations to this study that should be considered when interpreting the results. It is  
39  
40 important to note that this study does not provide any information on the validity of AMI coding.  
41  
42 Instead it only examines the validity of sub-categorizing AMI patients into STEMI and NSTEMI  
43  
44 patients. Therefore, given that our study only includes AMI patients, we are unable to provide the  
45  
46 positive predictive value, negative predictive value, sensitivity or specificity associated with the  
47  
48 AMI diagnosis. The reference standard for this study was a convenience sample of chart reviews  
49  
50 conducted over a three-month period for patients who presented to three hospitals in one Canadian  
51  
52 city. To ensure the generalizability of these study findings it would be valuable to conduct this type  
53  
54 of validation study over different regions of the country as well as internationally for the ICD-10  
55  
56  
57  
58  
59  
60

1  
2 AMI sub-type coding distinctions. Although this study was limited to a smaller study area, it  
3  
4 covered a range of hospital settings in a large urban center.  
5  
6

7 Conclusions  
8

9           Among AMI patients, the standard ICD-10 definition to classify patients as STEMI or  
10 NSTEMI is as accurate as the supplementary definition based on ECG codes. Our study  
11 demonstrates that the AMI subtype codes are valid and can be used in population-based outcome  
12  
13  
14  
15  
16  
17 studies.  
18  
19  
20  
21  
22  
23  
24  
25  
26  
27  
28  
29  
30  
31  
32  
33  
34  
35  
36  
37  
38  
39  
40  
41  
42  
43  
44  
45  
46  
47  
48  
49  
50  
51  
52  
53  
54  
55  
56  
57  
58  
59  
60

Confidential

1  
2 **Acknowledgements**  
3

4 None  
5  
6

7 **Funding Sources**  
8

9 During the course of the study, Drs Patel, Quan and Kaul were supported by Alberta Innovates  
10 Health Solutions (AIHS) Doctoral Studentship, Health Scholar, and Population Health Investigator  
11 awards, respectively.  
12  
13  
14  
15

16 **Disclosures**  
17

18 None  
19  
20  
21  
22  
23  
24  
25  
26  
27  
28  
29  
30  
31  
32  
33  
34  
35  
36  
37  
38  
39  
40  
41  
42  
43  
44  
45  
46  
47  
48  
49  
50  
51  
52  
53  
54  
55  
56  
57  
58  
59  
60

Confidential

## References

1. Colonna M, Mitton N, Schott A-M, Remontet L, Olive F, Gomez F, Iwaz J, Polazzi S, Bossard N, Trombert B. Joint use of epidemiological and hospital medico-administrative data to estimate prevalence. Application to french data on breast cancer. *Cancer epidemiol.* 2012;36:116-121
2. Garland A, Yogendran M, Olafson K, Scales DC, McGowan K-L, Fransoo R. The accuracy of administrative data for identifying the presence and timing of admission to intensive care units in a canadian province. *Medical Care.* 2012;50:e1-6
3. Haley VB, Van Antwerpen C, Tserenpuntsag B, Gase KA, Hazamy P, Doughty D, Tsivitis M, Stricof RL. Use of administrative data in efficient auditing of hospital-acquired surgical site infections, new york state 2009-2010. *Infect Control Hosp Epidemiol.* 2012;33:565-571
4. Manuel DG, Lam K, Maaten S, Klein-Geltink J. Using administrative data to measure the extent to which practitioners work together: "Interconnected" care is common in a large cohort of family physicians. *Open Med.* 2011;5:e177-182
5. Meenan RT, Goodman MJ, Fishman PA, Hornbrook MC, O'Keeffe-Rosetti MC, Bachman DJ. Pooling multisite administrative data for economic analysis. *Expert rev.* 2002;2:477-483
6. WHO. International classification of diseases (icd). 2009
7. Jetté N, Quan H, Hemmelgarn B, Drosler S, Maass C, Moskal L, Poin W, Sundararajan V, Gao S, Jakob R, Üstün B, Ghali WA, Investigators fI. The development, evolution, and modifications of icd-10: Challenges to the international comparability of morbidity data. *Medical Care.* 2010;48:1105-1110 1110.1097/MLR.1100b1013e3181ef1109d1103e

- 1  
2  
3  
4  
5  
6  
7  
8  
9  
10  
11  
12  
13  
14  
15  
16  
17  
18  
19  
20  
21  
22  
23  
24  
25  
26  
27  
28  
29  
30  
31  
32  
33  
34  
35  
36  
37  
38  
39  
40  
41  
42  
43  
44  
45  
46  
47  
48  
49  
50  
51  
52  
53  
54  
55  
56  
57  
58  
59  
60
8. McManus DD, Gore J, Yarzebski J, Spencer F, Lessard D, Goldberg RJ. Recent trends in the incidence, treatment, and outcomes of patients with stemi and nstemi. *American Journal of Medicine*. 2011;124:40-47
9. Montalescot G, Dallongeville J, Van Belle E, Rouanet S, Baulac C, Degrandart A, Vicaut E, for the OI. Stemi and nstemi: Are they so different? 1 year outcomes in acute myocardial infarction as defined by the esc/acc definition (the opera registry). *European Heart Journal*. 2007;28:1409-1417
10. Weiss ES, Chang DD, Joyce DL, Nwakanma LU, Yuh DD. Optimal timing of coronary artery bypass after acute myocardial infarction: A review of california discharge data. *J Thorac Cardiovasc Surg*. 2008;135:503-511, 511.e501-503
11. Tu JV, Austin PC, Chan BTB. Relationship between annual volume of patients treated by admitting physician and mortality after acute myocardial infarction. *Jama-Journal Of The American Medical Association*. 2001;285:3116-3122
12. Patel AB, Quan H, Faris P, Knudtson ML, Traboulsi M, Li B, Ghali WA. Temporal associations of early patient transfers and mortality with the implementation of a regional myocardial infarction care model. *Canadian Journal of Cardiology*. 2011;27:731-738
13. Canadian Institute of Health Information. Canadian coding standards for version 2012 icd-10-ca and cci. *Appendix A—Acute Coronary Syndrome (ACS) and Related Interventions*. 2012
14. Metcalfe A, Neudam A, Forde S, Liu M, Drosler S, Quan H, Jetté N. Case definitions for acute myocardial infarction in administrative databases and their impact on in-hospital mortality rates. *Health Services Research*. 2012:n/a-n/a
15. Zhang Z, Fang J, Gillespie C, Wang G, Hong Y, Yoon PW. Age-specific gender differences in in-hospital mortality by type of acute myocardial infarction. *American Journal of Cardiology*. 2012;109:1097-1103

- 1  
2  
3  
4  
5  
6  
7  
8  
9  
10  
11  
12  
13  
14  
15  
16  
17  
18  
19  
20  
21  
22  
23  
24  
25  
26  
27  
28  
29  
30  
31  
32  
33  
34  
35  
36  
37  
38  
39  
40  
41  
42  
43  
44  
45  
46  
47  
48  
49  
50  
51  
52  
53  
54  
55  
56  
57  
58  
59  
60
16. Varas-Lorenzo C, Castellsague J, Stang MR, Tomas L, Aguado J, Perez-Gutthann S. Positive predictive value of icd-9 codes 410 and 411 in the identification of cases of acute coronary syndromes in the saskatchewan hospital automated database. *Pharmacoepidemiology & Drug Safety*. 2008;17:842-852
  17. Metcalfe A. Case definitions for defining acute myocardial infarction in administrative databases: A systematic review and the impact of validated case definitions on in-hospital mortality rate. 2012
  18. Cannon CP. Update to international classification of diseases, 9th revision codes: Distinguishes stemi from nstemi. *Critical Pathways in Cardiology: A Journal of Evidence-Based Medicine*. 2005;4:185-186
  19. Steinberg BA, French WJ, Peterson ED, Frederick PD, Cannon CP, National Registry of Myocardial Infarction I. Missed diagnosis of the diagnosis codes: Comparison of international classification of diseases, 9th revision coding and st- versus non-st-elevation myocardial infarction diagnosis in the national registry of myocardial infarction. *Critical Pathways in Cardiology: A Journal of Evidence-Based Medicine*. 2006;5:59-63
  20. Woo KS, Ghali WA, Southern DA, Tu JV, Parsons G, Graham MM. Feasibility of determining myocardial infarction type from medical record review. *Canadian Journal of Cardiology*. 2008;24:115-117

1  
2  
3 **Figure Legend**  
4  
5  
6

7 **Figure 1:** Steps to defining a study sample for validating AMI sub-type coding  
8  
9

10 AMI indicates acute myocardial infarction; ECG, electrocardiogram; PHN, personal health number;  
11

12  
13 NSTEMI, non-ST-elevation myocardial infarction; STEMI, ST-elevation myocardial infarction  
14  
15  
16  
17  
18  
19  
20  
21  
22  
23  
24  
25  
26  
27  
28  
29  
30  
31  
32  
33  
34  
35  
36  
37  
38  
39  
40  
41  
42  
43  
44  
45  
46  
47  
48  
49  
50  
51  
52  
53  
54  
55  
56  
57  
58  
59  
60

Confidential

1  
2  
3  
4  
5  
6  
7  
8  
9  
10  
11  
12  
13  
14  
15  
16  
17  
18  
19  
20  
21  
22  
23  
24  
25  
26  
27  
28  
29  
30  
31  
32  
33  
34  
35  
36  
37  
38  
39  
40  
41  
42  
43  
44  
45  
46  
47  
48  
49

**Table 1. Evaluating the validity of ICD-10-CA coding for AMI sub-types among AMI patients**

| Patients        | Chart Review |        | Standard Definition* |        |             |        | ECG Definition** |        |             |        |
|-----------------|--------------|--------|----------------------|--------|-------------|--------|------------------|--------|-------------|--------|
|                 | N            |        | N                    |        | Agreement % |        | N                |        | Agreement % |        |
|                 | STEMI        | NSTEMI | STEMI                | NSTEMI | STEMI       | NSTEMI | STEMI            | NSTEMI | STEMI       | NSTEMI |
| Overall         | 143          | 147    | 132                  | 158    | 92.31       | 100    | 131              | 158    | 91.61       | 100    |
| Female          | 46           | 55     | 40                   | 61     | 86.96       | 100    | 41               | 60     | 89.13       | 100    |
| Male            | 97           | 92     | 92                   | 97     | 94.85       | 100    | 90               | 98     | 92.78       | 100    |
| Age < 65 years  | 82           | 67     | 81                   | 70     | 98.78       | 100    | 79               | 69     | 96.34       | 100    |
| Age >= 65 years | 61           | 80     | 51                   | 88     | 83.61       | 100    | 52               | 89     | 85.25       | 100    |

\* I21.0-3 for STEMI vs. I21.4x for NSTEMI. N=290.

\*\* R94.30 (“ECG suggestive of STEMI”) vs. R94.31 (“ECG suggestive of NSTEMI”). N=289 because chart Review for ECG definition is missing one male under 65 years of age



**Table 2. Application of coding definitions to in-patient data**

| Group                      | AMI type | Coding Definition | Mortality (%) | Number of Patients |
|----------------------------|----------|-------------------|---------------|--------------------|
| <b>Overall</b>             |          |                   |               |                    |
| <i>Standard definition</i> | STEMI    | I21.0,1, 2 or 3   | 5.51          | 5713               |
|                            | NSTEMI   | I21.4x            | 3.95          | 9435               |
| <i>ECG definition</i>      | STEMI    | R94.30            | 5.42          | 5530               |
|                            | NSTEMI   | R94.31            | 3.89          | 9070               |
| <b>Female</b>              |          |                   |               |                    |
| <i>Standard definition</i> | STEMI    | I21.0,1, 2 or 3   | 8.79          | 5713               |
|                            | NSTEMI   | I21.4x            | 4.82          | 9435               |
| <i>ECG definition</i>      | STEMI    | R94.30            | 8.63          | 5530               |
|                            | NSTEMI   | R94.31            | 4.77          | 9070               |
| <b>Male</b>                |          |                   |               |                    |
| <i>Standard definition</i> | STEMI    | I21.0,1, 2 or 3   | 4.32          | 5713               |
|                            | NSTEMI   | I21.4x            | 3.51          | 9435               |
| <i>ECG definition</i>      | STEMI    | R94.30            | 4.28          | 5530               |
|                            | NSTEMI   | R94.31            | 3.45          | 9070               |
| <b>Age &lt; 65 years</b>   |          |                   |               |                    |
| <i>Standard definition</i> | STEMI    | I21.0,1, 2 or 3   | 2.15          | 5713               |
|                            | NSTEMI   | I21.4x            | 0.62          | 9435               |
| <i>ECG definition</i>      | STEMI    | R94.30            | 2.2           | 5530               |
|                            | NSTEMI   | R94.31            | 0.57          | 9070               |
| <b>Age &gt;= 65 years</b>  |          |                   |               |                    |
| <i>Standard definition</i> | STEMI    | I21.0,1, 2 or 3   | 10.25         | 5713               |
|                            | NSTEMI   | I21.4x            | 6.41          | 9435               |
| <i>ECG definition</i>      | STEMI    | R94.30            | 10.07         | 5530               |
|                            | NSTEMI   | R94.31            | 6.36          | 9070               |

1  
2  
3  
4  
5  
6  
7  
8  
9  
10  
11  
12  
13  
14  
15  
16  
17  
18  
19  
20  
21  
22  
23  
24  
25  
26  
27  
28  
29  
30  
31  
32  
33  
34  
35  
36  
37  
38  
39  
40  
41  
42  
43  
44  
45  
46  
47  
48  
49  
50  
51  
52  
53  
54  
55  
56  
57  
58  
59  
60

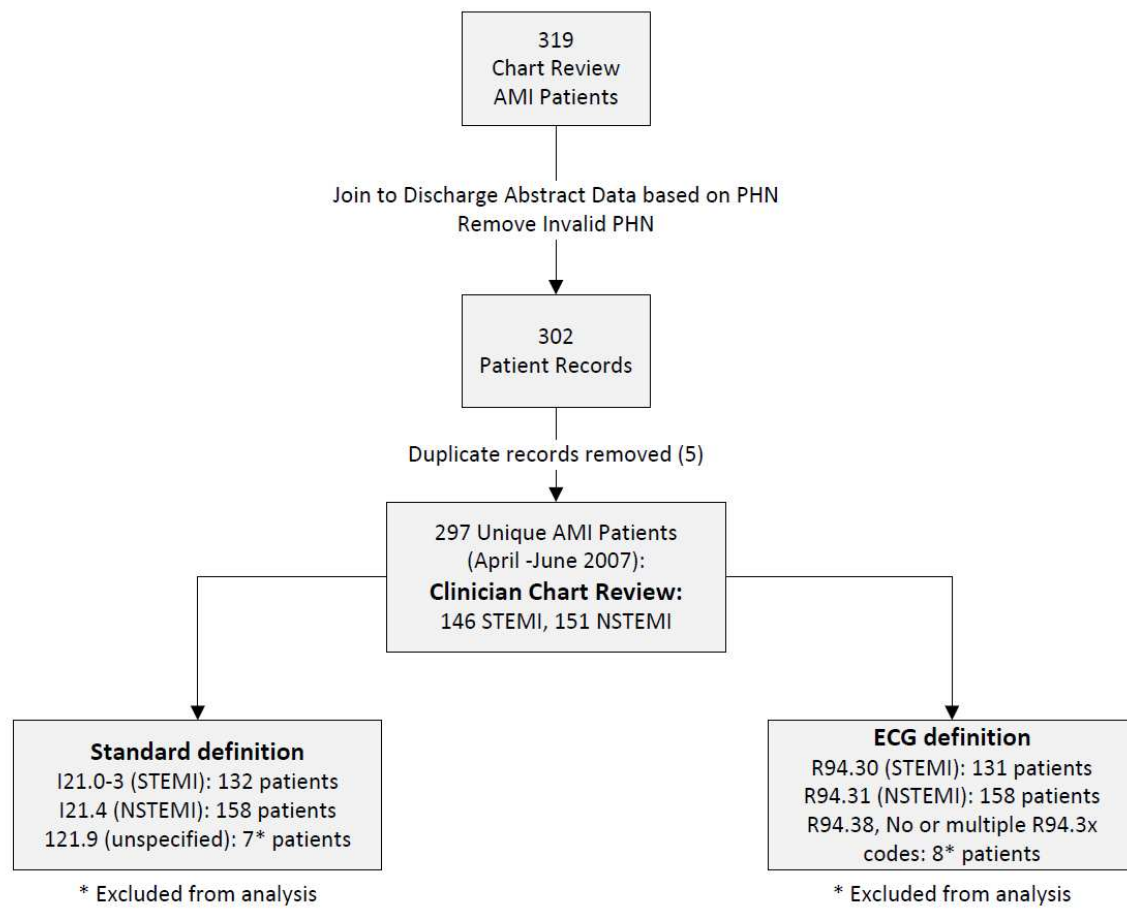

Figure 1. Steps to defining a study sample for validating AMI sub-type coding
